# Supplementary material for: Predicting Odor Pleasantness with an Electronic Nose
Source: PLoS Comput Biol. 2010 Apr 15;6(4):e1000740. doi: 10.1371/journal.pcbi.1000740 (PMC2855315; doi:10.1371/journal.pcbi.1000740)
Supplement: Table S1 — List of odorants used (0.04 MB XLS) [file pcbi.1000740.s001.xls]

## Sheet: Sheet1
	Traing set
	CAS	Name	Pleasantness
1	60-12-8	Phenylethyl Alcohol	21431.1
2	119-36-8	methyl salicylate	16021.3
3	111-27-3	hexanol	16836.2
4	107-92-6	butryic_acid	4130.67
5	111-70-6	heptanol	16868
6	97-53-0	eugenol	10292
7	590-86-3	isovalerylaldehyde	7595.92
8	540-18-1	n-amyl butyrate	22341.8
9	140-39-6	4-cresyl acetate	3157.5
10	109-52-4	pentanoic_acid	1325.75
11	1122-62-9	Acetylpyridine	7327.75
12	100-66-3	anisole	16250.2
13	123-32-0	2,5-dimethylpyrazine	14864.8
14	352-93-2	diethysulfide	8147.75
15	5392-40-5	citral	30653
16	462-95-3	Diethoxymethane	11752
17	106-72-9	2,6-Dimethyl-5-heptenal	18365
18	105-37-3	ethyl_propionate	21835.8
19	13925-00-3	Ethylpyrazine	4796
20	5910-89-4	2,3-dimethylpyrazine1	7104.5
21	470-82-6	1,8 - cineole	25604.2
22	623-37-0	3-hexanol	6225.75
23	104-93-8	4-Methylanisole	17665.2
24	2432-51-1	methyl thiolbutyrate	2159.75
25	85-91-6	Dimethyl anthranilate	16101.2
26	110-86-1	pyridine	4691.5
27	625-84-3	2,5-dimethylpyrrole	7089.75
28	66-25-1	hexanal	9294
29	90-87-9	1,1-Dimethoxy-2-phenylpropane	16205.2
30	80-56-8	alpha-pinene	21314.2
31	17369-59-4	Propylidenephthalide	11468.5
32	103-93-5	p-Tolyl isobutyrate	13390.2
33	6485-40-1	R-carvone	29863.5
34	98-86-2	acetophenone	8430
35	111-87-5	octanol	8817.25
36	105-54-4	ethyl_butyrate	6210.75
37	123-92-2	isoamyl_acetate	21180.2
38	503-74-2	isovaleric_acid	1459.5
39	110-01-0	tetrahydrothiophene	16369
40	110-02-1	Thiophene	6255.25
41	87-44-5	caryophyllene	12585.8
42	5655-61-8	L-bornyl acetate	14432.2
43	108-88-3	toluene	15758.2
44	529-20-4	2-methylbenzaldehyde	8698.25
45	91-62-3	6-methylquinoline	6792
46	138-86-3	Dipentene	20510
47	71-36-3	butanol	9532.25
48	78-93-3	Ethyl_methyl	15921.8
49	100-51-6	benzyl_alcohol	11721.8
50	123-25-1	diethyl succinate	16681.5
51	513-85-9	2,3-butylene glycol	14998.8
52	5405-41-4	ethyl 3-hydroxybutyrate	13628.5
53	141-78-6	ethyl_acetate	17025
54	93-89-0	Ethyl benzoate	9457.5
55	110-38-3	ethyl_decanoate	12287.8
56	2639-63-6	hexyl_butyrate	18678
57	110-43-0	2-heptanone	15907.5
58	2497-18-9	trans-2-Hexenyl acetate	17382.5
59	142-92-7	hexyl_acetate	19035.8
60	110-19-0	Isobutyl acetate	19422.8
61	79-31-2	isobutyric acid	4706.5
62	505-10-2	3-methylthio-1-propanol	4006.75
63	123-66-0	ethyl_hexanoate	17739.8
64	97-64-3	Ethyl lactate	14462.5
65	5989-27-5	limonene	25068
66	93-58-3	Methyl benzoate	16786.5
67	106-70-7	methyl_hexanoate	7864.25
68	464-49-3	R_camphor	19944
69	2216-51-5	D_menthol	21642
70	90-05-1	guaicol	7566
71	108-93-0	cyclohexanol	4900
72	2459-09-8	Methyl isonicotinate	2264
73	105-66-8	propyl_butyrate	13882
74	111-71-7	Heptanal	7566
75	123-86-4	butyl_acetate	22581
76	2173-56-0	Amyl valerate	20242
	Pleasantness VAS scaling is from 0 to 32767
	Experiment 1 - essential oils
	CAS	Name	Pleasantness
	oils1	methyl salicylate oil	13166.5
	oils2	patchouly oil colorless	8073
	oils3	peppermint oil	20376
	oils4	civet artessence absolute	3217.5
	oils5	peach d-cs	24427
	oils6	amyl acetate extra iso	19184.5
	oils7	fir balsam oil canada	17159
	oils8	fennel oil sweet	15132
	oils9	freesia rhs 4 pmf	20078.5
	oils10	estragon oil	15997
	oils11	viridine	17159
	oils12	lime oil expressed wi	26185
	oils13	mimosa artessence	17248.5
	oils14	castoreum artess resin	8311
	oils15	cassia oil chinese	18231.5
	oils16	lilial oil	17159
	oils17	peru balsam oil	15609
	oils18	bergamot oil italy orpur	24725
	oils19	orange oil florida	24516.5
	oils20	nutmeg oil indonesia	14984
	oils21	grapefruit oil california cp	25321
	oils22	eucalyptus globulus oil china	13643
	Experiment 3 - novel odorants experiment
	CAS	Name	Pleasantness
	10482-56-1	alpha-terpineol	17069.5
	106-32-1	ethyl_octanoate	21806
	107-87-9	2-pentanone	14268.5
	109-60-4	propyl_acetate	13643.5
	111-11-5	methyl_octanoate	20317
	122-78-1	phenylacetaldehyde	18052.5
	123-51-3	isopentyl alcohol	12243
	18172-67-3	(-)-beta-Pinene	16801
	498-15-7	3-carene	15550
	60047-17-8	Linalool oxide	16264.5
	6032-29-7	2-pentanol	12451.5
	616-25-1	1-penten-3-ol	12302.5
	623-42-7	methyl_butyrate	5242.5
	628-63-7	pentyl_acetate	22461.5
	67-64-1	acetone	17188.5
	71-23-8	propanol	17069.5
	79-09-4	propionic_acid	2710.5
	79-20-9	methyl_acetate	17099.5
	928-94-9	cis-2-Hexen-1-ol	10545.5
	928-97-2	3-hexen-1-ol	6970.5
	99-87-6	p cymene	13196
